# Supplementary material for: Quantifying unequal urban resilience to rains across China from location-aware big data
Source: Copernicus journal article supplement (doi:10.5194/nhess-2022-167), 2022-07-04
Supplement: Supplementary file 1 [file nhess-2022-167-supplement.pdf]

# Supplementary Information

For

## Quantifying unequal urban resilience to rains across China from location-aware big data

5

10

15

20

25

30

35

40

## Supplementary Figure

45

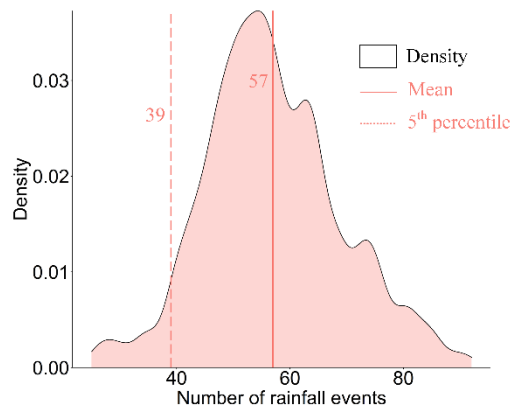

**Supplementary Figure 1.** The probability density function of the number of rainfall events for all cities.

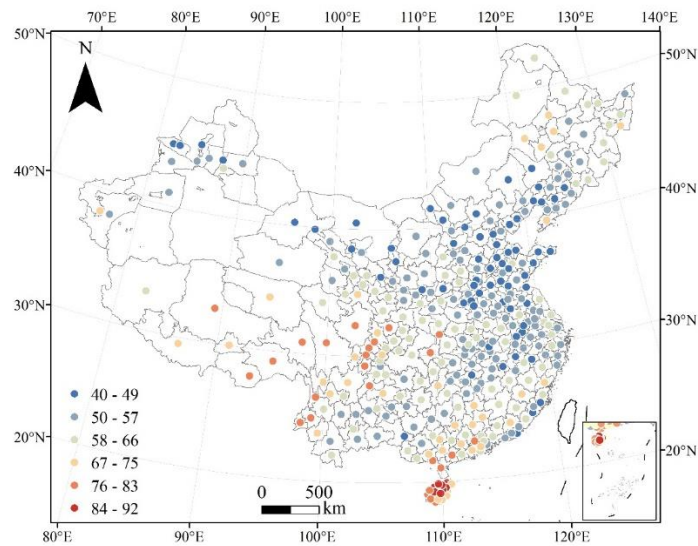

50 **Supplementary Figure 2.** The number of rainfall events by city.

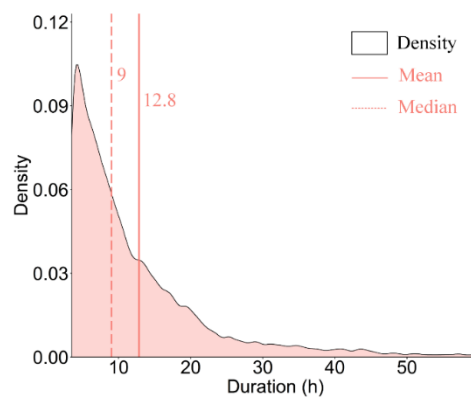

**Supplementary Figure 3.** The rainfall duration probability density function for all rainfall events.

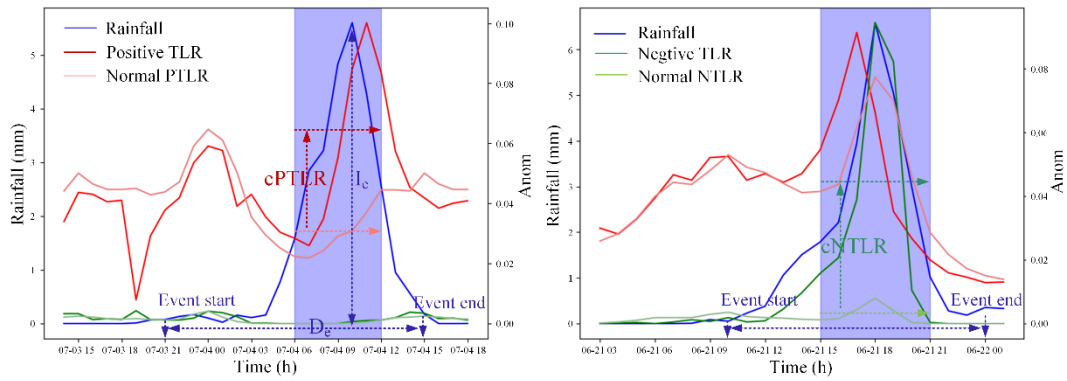

55 **Supplementary Figure 4.** Definitions of the variables of rainfall and human activity anomalies used in this study, as exemplified by Beijing and Zhuhai city.

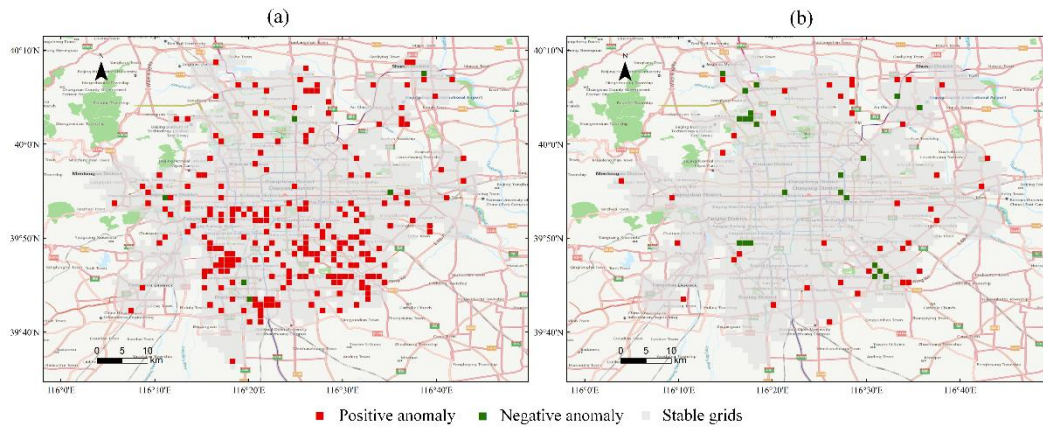

60 **Supplementary Figure 5.** The stable grids with positive, negative, and no anomalies in Beijing when it is raining at 10:00 am on July 04, 2017 (a) and not raining at 10:00 am on June 18, 2017 (b).

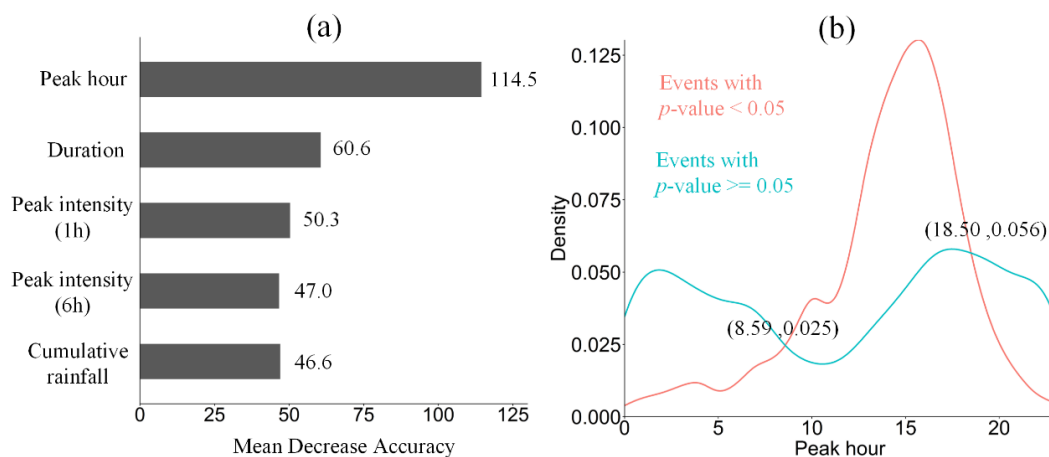

65 **Supplementary Figure 6.** (a) The importance of the five rainfall indicators obtained by the random forest model. The peak hour is the most important covariate that triggers human activity anomalies and has the highest decrease accuracy value of 114.5. (b) The peak hour thresholds identified from the differences of the peak hour PDF values between the rainfall events with and without significant collective human activity anomalies. When the peak hours

are between 8:59 am and 6:50 pm, the PDF values of the events with human activity anomalies are higher than those without. In other words, daytime rains are more likely to trigger human activity anomalies. There are 11,491 daytime rains (i.e., from 8.59 am to 6.50 pm) out of the total 20,860 rainfall events (ratio: 55.11%).

70

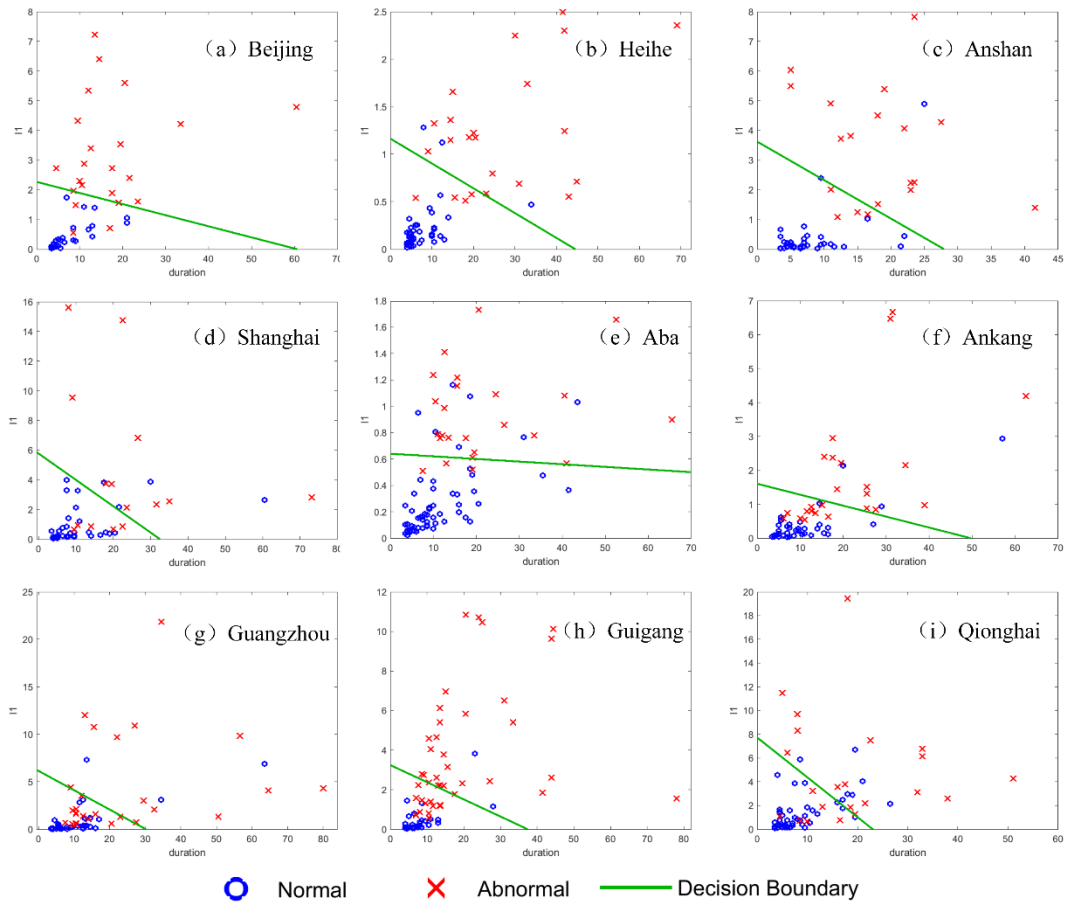

**Supplementary Figure 7.** The binary classification results of the cities in Northern(a-c), Midwestern(d-f), and Southern(g-i) China.

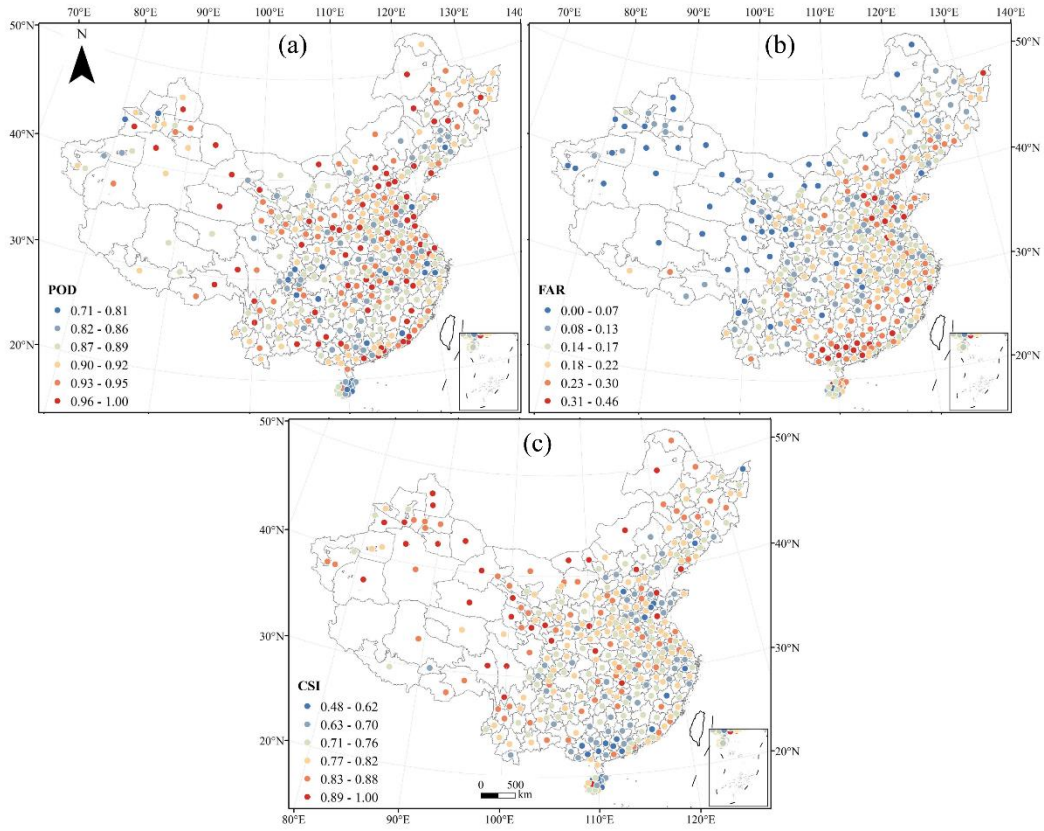

75

**Supplementary Figure 8.** The POD, FAR, and CSI of rainfall threshold detection based on the binary classifiers.

80

85

90

95

**Supplementary Table**

100 **Supplementary Table 1.** Rainfall indices uses in this study

| Rainfall indices    | Description                                 |
|---------------------|---------------------------------------------|
| Peak intensity (1h) | Hourly peak rainfall intensity              |
| Peak intensity (6h) | Six-hour-window peak rainfall intensity     |
| Cumulative rainfall | Cumulative rainfall during a rainfall event |
| Duration            | The time period a rainfall event lasts      |
| Peak hour           | The time of peak intensity(1h)              |

**Supplementary Table 2.** Correlations between the 3-hour rainfall threshold and explanatory variables

| Urban indices            | Coefficients | Kendall | Pearson | Spearman |
|--------------------------|--------------|---------|---------|----------|
| Annual rainfall          | 0.40***      | 0.22*** | 0.40*** | 0.31***  |
| Population density       | 0.21**       | 0.27*** | 0.40*** | 0.40***  |
| Gross domestic product   | 0.20*        | 0.25*** | 0.40*** | 0.37***  |
| Area of paved roads      | -0.16*       | -0.05   | -0.17*  | -0.07    |
| Green coverage rate      | 0.17         | 0.21**  | 0.27**  | 0.31**   |
| Drainage network density | 0.09         | 0.17*   | 0.20*   | 0.24*    |

105 \*\*\*p<0.001;\*\*p<0.01;\*p<0.05.  $R^2=0.40$ .

**Supplementary Table 3.** Correlations between the 6-hour rainfall threshold and the explanatory variables

| Urban indices            | Coefficients | Kendall | Pearson | Spearman |
|--------------------------|--------------|---------|---------|----------|
| Annual rainfall          | 0.43***      | 0.24*** | 0.42*** | 0.33***  |
| Population density       | 0.21**       | 0.26*** | 0.39*** | 0.38***  |
| Gross domestic product   | 0.20*        | 0.24*** | 0.39*** | 0.36***  |
| Area of paved roads      | -0.17*       | -0.06   | -0.19*  | -0.09    |
| Green coverage rate      | 0.16         | 0.20**  | 0.26**  | 0.30**   |
| Drainage network density | 0.10         | 0.17*   | 0.20*   | 0.24*    |

110 \*\*\*p<0.001;\*\*p<0.01;\*p<0.05.  $R^2=0.42$

115

**Supplementary Table 4.** Correlations between the 12-hour rainfall threshold and the explanatory variables

| Urban indices            | Coefficients | Kendall | Pearson | Spearman |
|--------------------------|--------------|---------|---------|----------|
| Annual rainfall          | 0.50***      | 0.35*** | 0.49*** | 0.50***  |
| Population density       | 0.19*        | 0.19*** | 0.31**  | 0.27**   |
| Gross domestic product   | 0.13         | 0.15*   | 0.29**  | 0.22*    |
| Area of paved roads      | -0.17*       | -0.12   | -0.23*  | -0.17    |
| Green coverage rate      | 0.07         | 0.12    | 0.17    | 0.19     |
| Drainage network density | 0.10         | 0.14*   | 0.18    | 0.20*    |

\*\*\*p<0.001;\*\*p<0.01;\*p<0.05.  $R^2=0.38$ .

120

**Supplementary Table 5.** Correlations between the response sensitivity and the explanatory variables

| Urban indice             | Coefficients | Kendall  | Pearson  | Spearman |
|--------------------------|--------------|----------|----------|----------|
| Annual rainfall          | -0.37***     | -0.22*** | -0.35*** | -0.33*** |
| Population density       | -0.19*       | -0.23*** | -0.34*** | -0.33*** |
| Gross domestic product   | -0.17        | -0.23*** | -0.34*** | -0.38*** |
| Area of paved roads      | 0.05         | 0.03     | 0.05     | 0.06     |
| Green coverage rate      | -0.05        | -0.18**  | -0.20*   | -0.26**  |
| Drainage network density | -0.20*       | -0.18**  | -0.29**  | -0.27**  |

\*\*\*p<0.001;\*\*p<0.01;\*p<0.05.  $R^2=0.31$

125
